# Supplementary material for: Adiponectin stimulates glucose utilization and fatty-acid oxidation by activating AMP-activated protein kinase
Source: Springer Nature journal article supplement (doi:10.1038/nm788), 2002-10-07
Supplement: 41591_2002_BFnm788_MOESM1_ESM.pdf [file 41591_2002_BFnm788_MOESM1_ESM.pdf]

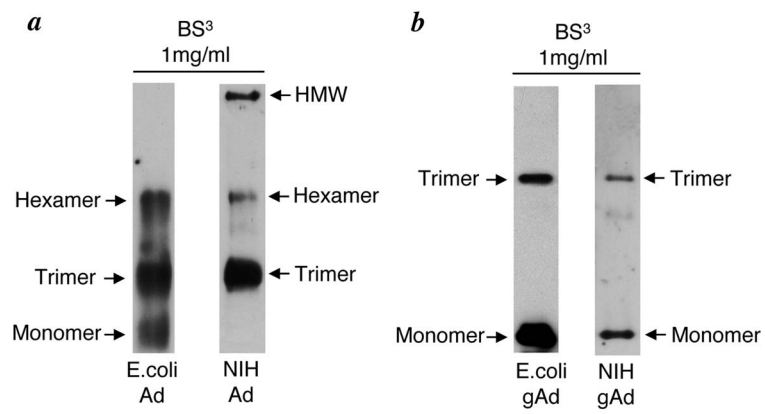

**Supplementary Fig. A** Analysis of *E. coli*- and NIH cell-produced Ad oligomers by cross-linking. *a* and *b*, Immunoblot analysis using anti-Ad antibody<sup>5</sup> of full-length Ad (*a*) or gAd (*b*) produced by *E. coli* (left) or NIH3T3 cells (right) after cross-linking using BS<sup>3</sup> (1 mg/ml).
